# Supplementary material for: Synthesis of colorant-modified polystyrene copolymers with tailored structures for toner applications
Source: Royal Society of Chemistry journal article supplement (doi:10.1039/c6ra19607a), 2016-01-01
Supplement: c6ra19607a1.pdf [file c6ra19607a1.pdf]

## Supporting Information

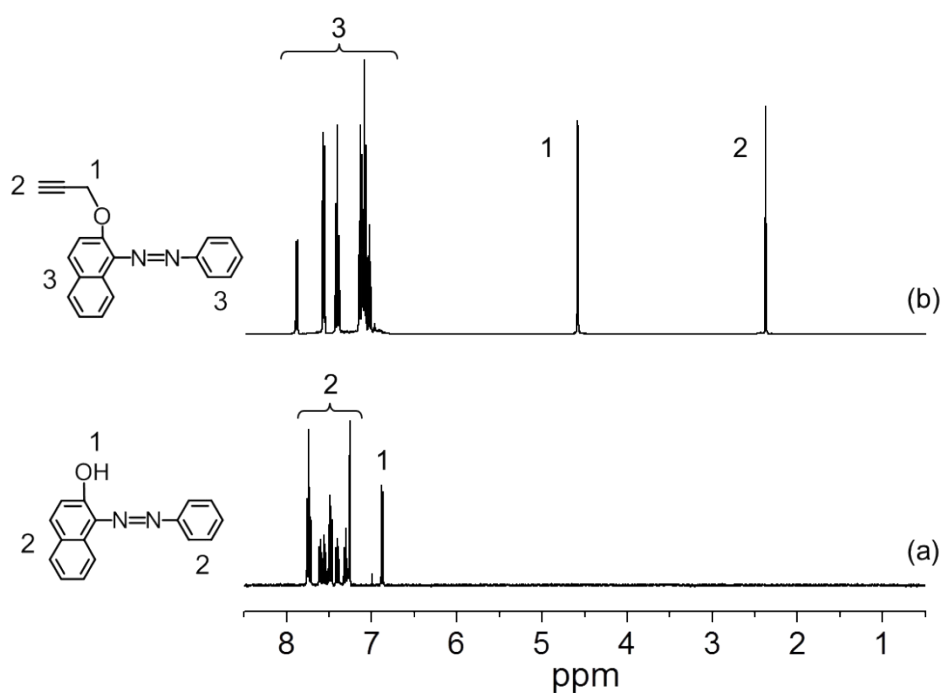

Fig S1 <sup>1</sup>H-NMR spectra of (a) 1-phenylazo-2-naphthol (oil orange) and (b) propargylized oil orange (PrO)

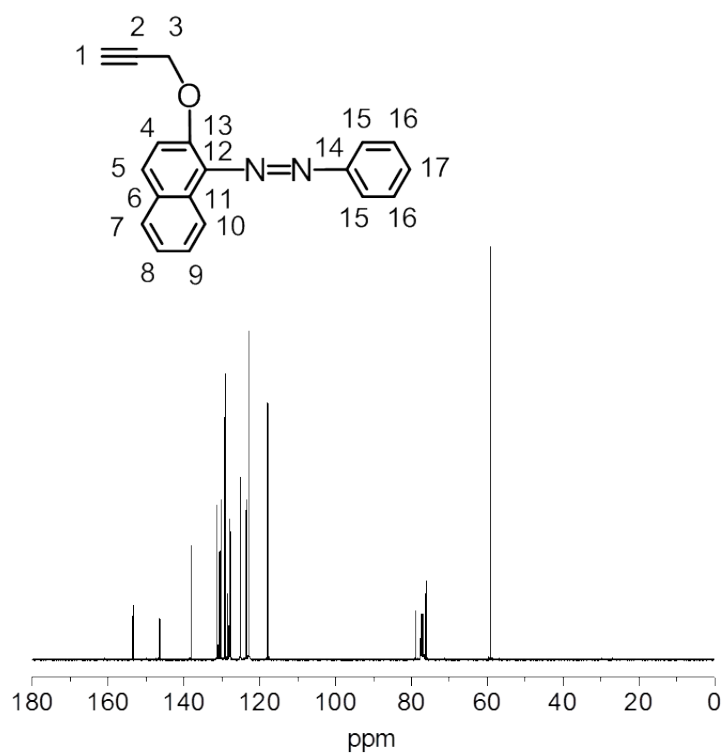

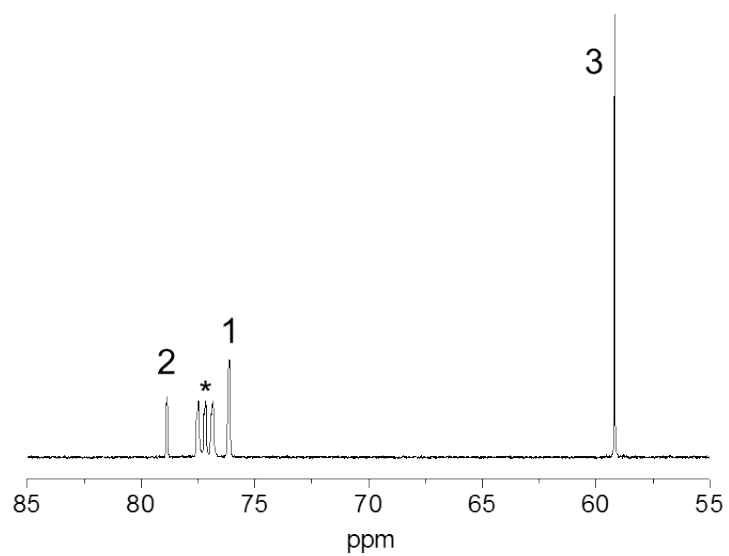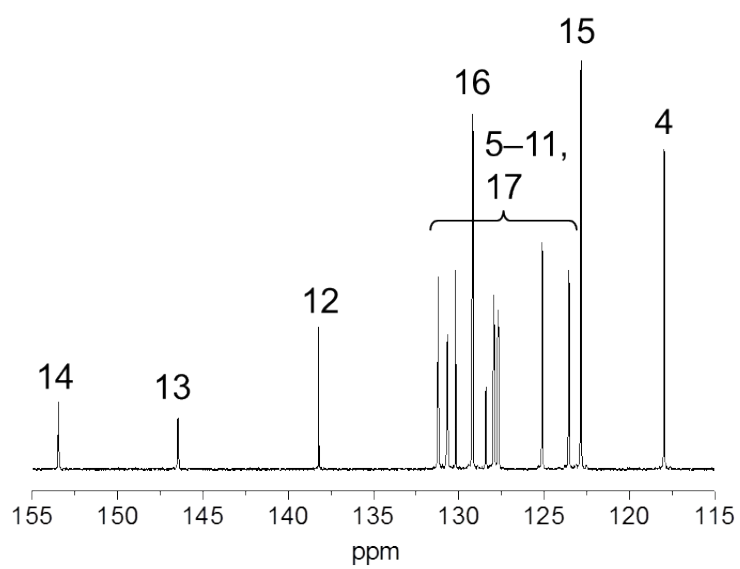

Fig S2 <sup>13</sup>C-NMR spectrum of propargylized oil orange (PrO)

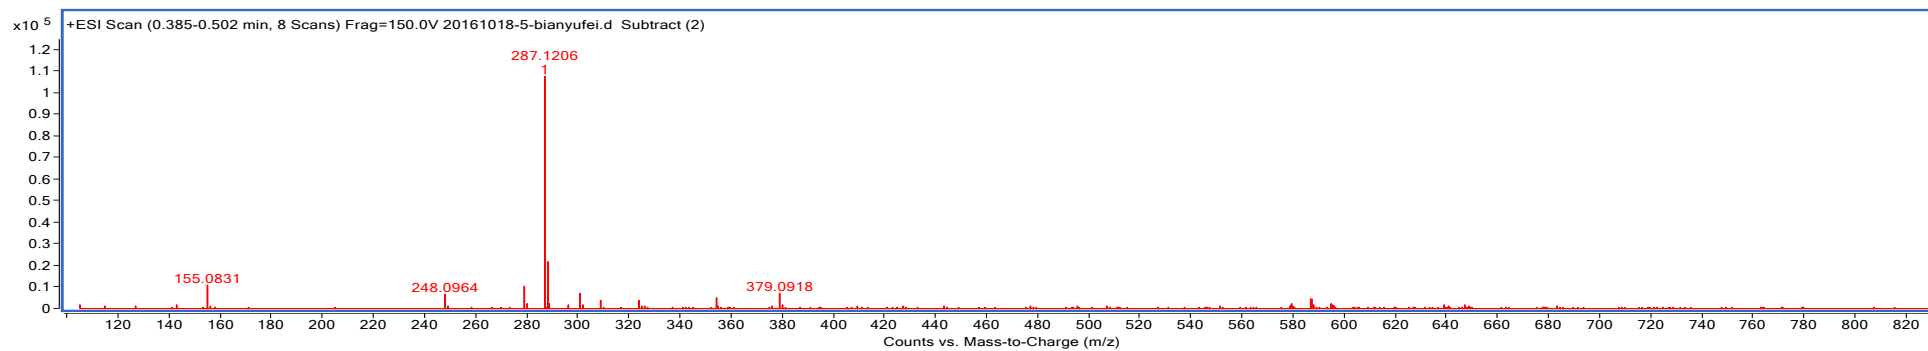

Fig S3 Mass spectrum of propargylized oil orange (PrO)

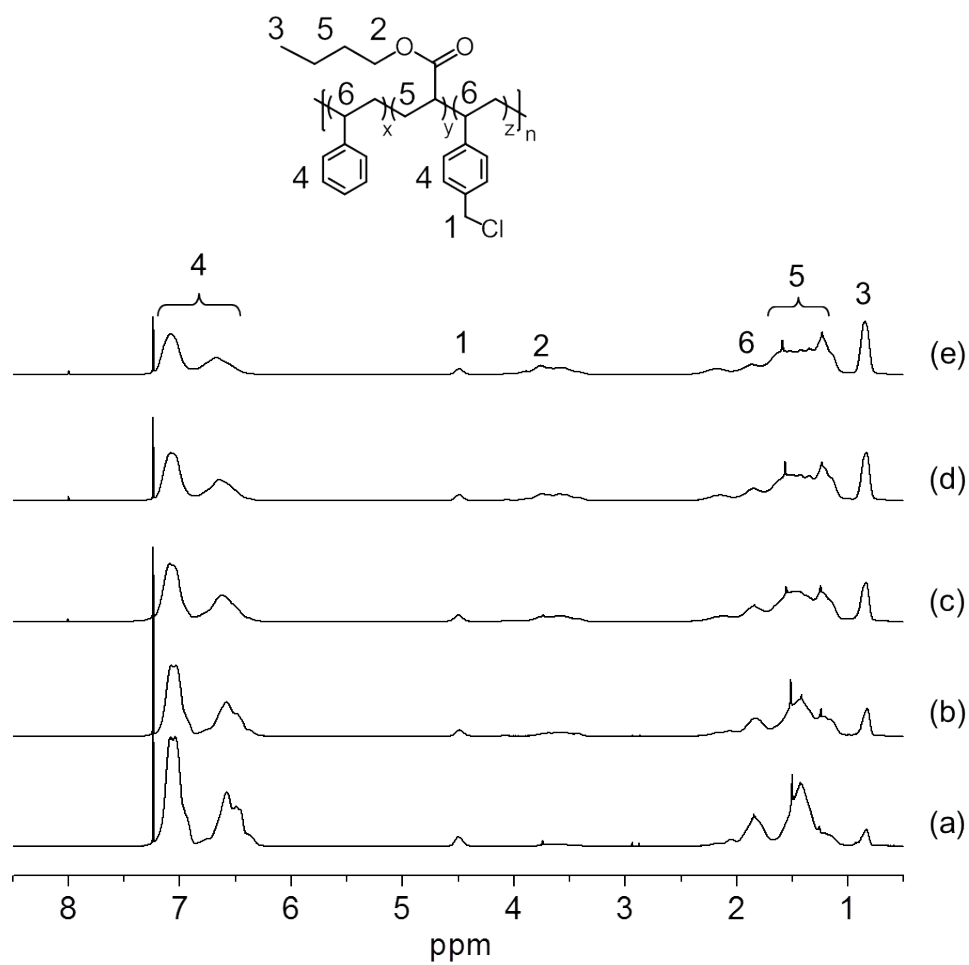

Fig S4  $^1\text{H-NMR}$  spectra of P(St-BA-CMS) terpolymers with St/BA/CMS feeding ratio (mol) of (a) 90/5/5 (run 1), (b) 80/15/5 (run 3), (c) 70/25/5 (run 5), (d) 60/35/5 (run 7), and (e) 50/45/5 (run 9) in Table 1

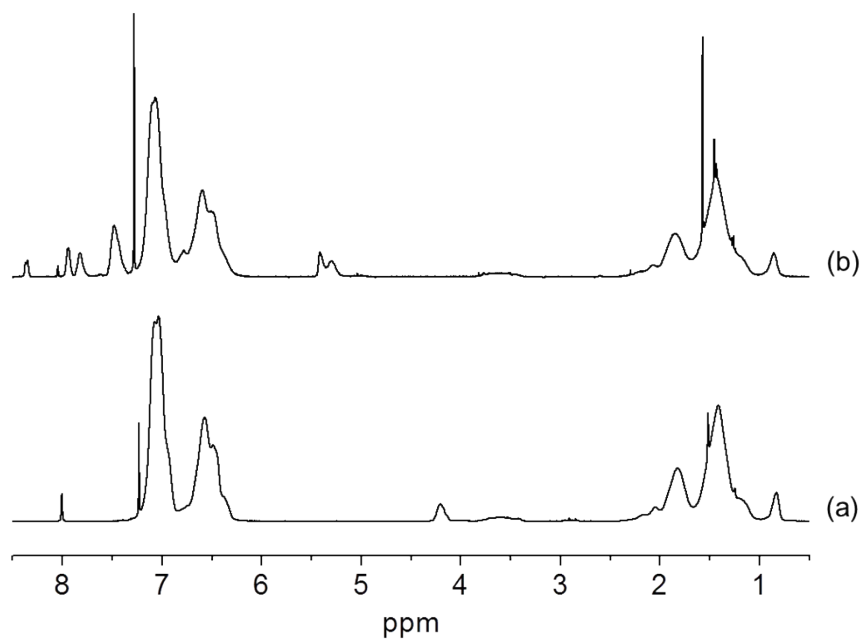

Fig S5 <sup>1</sup>H-NMR spectra of (a) PS-N<sub>3</sub> precursor and (b) PrO-functionalized styrene copolymer PS-O1 in Table 3

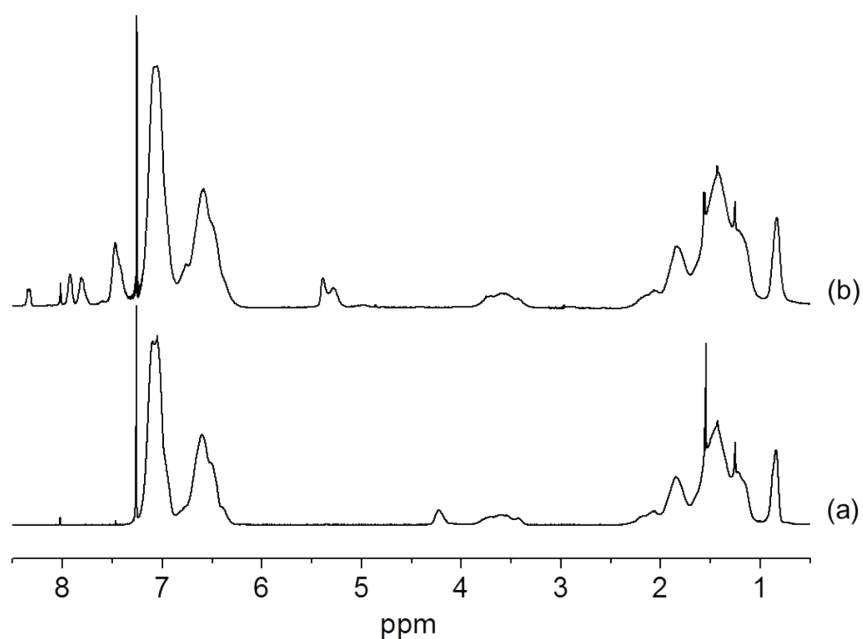

Fig S6 <sup>1</sup>H-NMR spectra of (a) PS-N<sub>3</sub> precursor and (b) PrO-functionalized styrene copolymer PS-O2 in Table 3

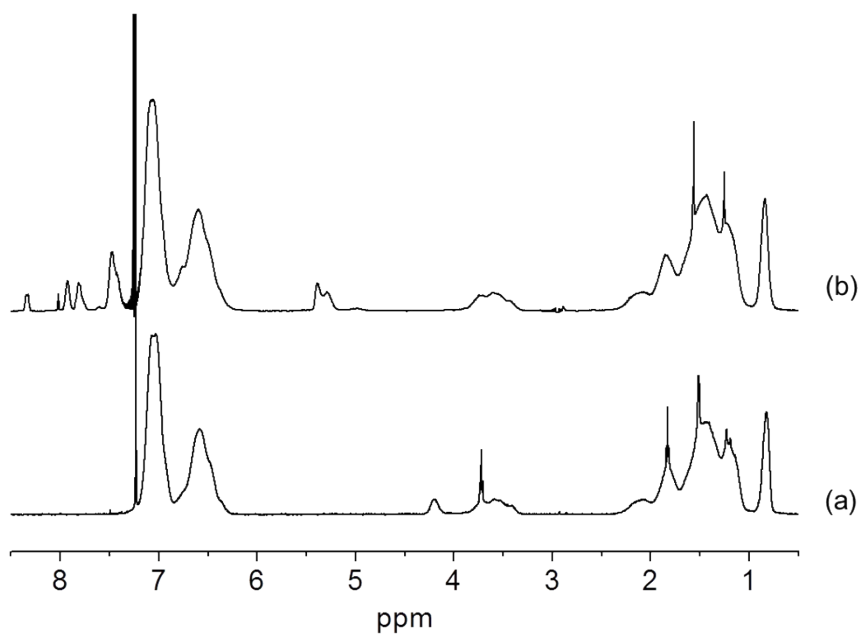

Fig S7 <sup>1</sup>H-NMR spectra of (a) PS-N<sub>3</sub> precursor and (b) PrO-functionalized styrene copolymer PS-O3 in Table 3

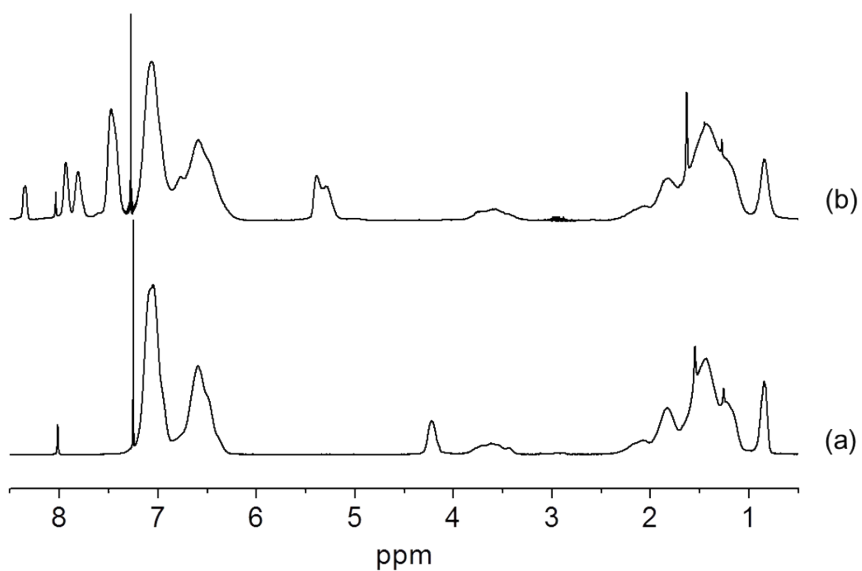

Fig S8 <sup>1</sup>H-NMR spectra of (a) PS-N<sub>3</sub> precursor and (b) PrO-functionalized styrene copolymer PS-O4 in Table 3

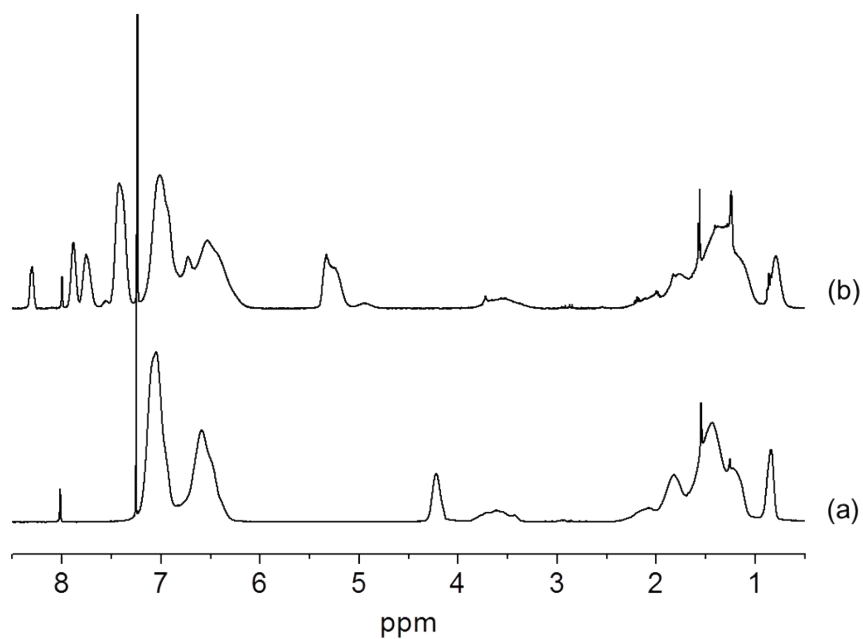

Fig S9 <sup>1</sup>H-NMR spectra of (a) PS-N<sub>3</sub> precursor and (b) PrO-functionalized styrene copolymer PS-O5 in Table 3

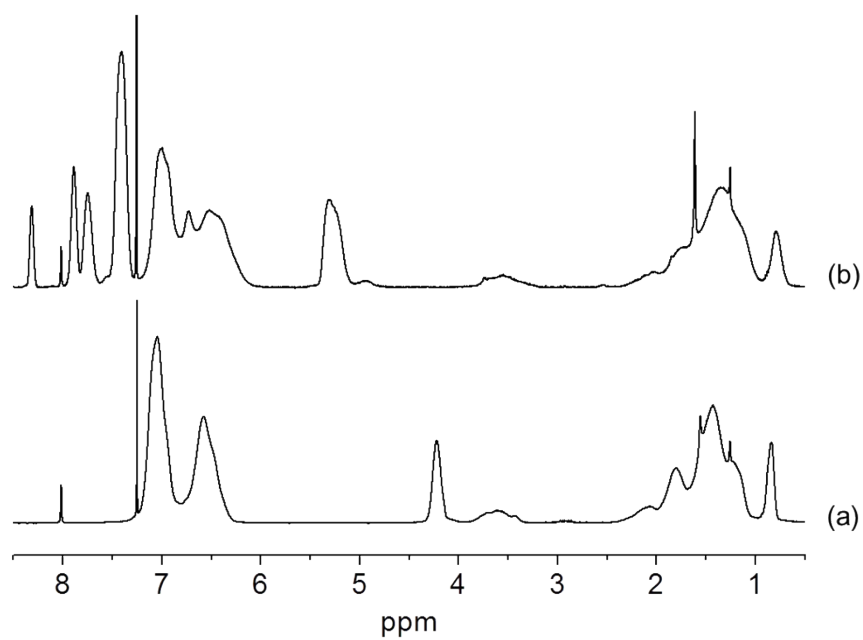

Fig S10 <sup>1</sup>H-NMR spectra of (a) PS-N<sub>3</sub> precursor and (b) PrO-functionalized styrene copolymer PS-O6 in Table 3
